# Detection of task-relevant and task-irrelevant motion sequences: application to motor adaptation in goal-directed and whole-body movements

Daisuke Furuki<sup>1</sup>, Ken Takiyama<sup>1</sup>

<sup>1</sup>Department of Electrical and Electronic Engineering, Tokyo University of Agriculture and Technology, Koganei-shi, Tokyo 184-8588, Japan, Correspondence should be addressed to K.T. (t.j.ken.takiyama@gmail.com).

## Abstract

1

2 Motor variability is inevitable in our body movements and is discussed from several various perspectives  
3 in motor neuroscience and biomechanics; it can originate from the variability of neural activities, it can  
4 reflect a large degree of freedom inherent in our body movements, it can decrease muscle fatigue, or it  
5 can facilitate motor learning. How to evaluate motor variability is thus a fundamental question in motor  
6 neuroscience and biomechanics. Previous methods have quantified (at least) two striking features of motor  
7 variability; the smaller variability in the task-relevant dimension than in the task-irrelevant dimension  
8 and the low-dimensional structure that is often referred to as synergy or principal component. However,  
9 those previous methods were not only unsuitable for quantifying those features simultaneously but also  
10 applicable in some limited conditions (e.g., a method cannot consider motion sequence, and another  
11 method cannot consider how each motion is relevant to performance). Here, we propose a flexible and  
12 straightforward machine learning technique that can quantify task-relevant variability, task-irrelevant  
13 variability, and the relevance of each principal component to task performance while considering the  
14 motion sequence and the relevance of each motion sequence to task performance in a data-driven manner.  
15 We validate our method by constructing a novel experimental setting to investigate goal-directed and  
16 whole-body movements. Furthermore, our setting enables the induction of motor adaptation by using  
17 perturbation and evaluating the modulation of task-relevant and task-irrelevant variabilities through  
18 motor adaptation. Our method enables the identification of a novel property of motor variability; the  
19 modulation of those variabilities differs depending on the perturbation schedule. Although a gradually  
20 imposed perturbation does not increase both task-relevant and task-irrelevant variabilities, a constant  
21 perturbation increases task-relevant variability.

## 22 Introduction

23 In our daily life, we can repeatedly achieve desired movements, such as grasping a cup, throwing a ball,  
24 and playing the piano. To achieve the desired movements, our motor system needs to resolve at least two  
25 difficulties inherent in our body motion [1]. A difficulty is movement variability. Due to the variability  
26 inherent in various stages such as sensing sensory information [2], neural activities in motor planning [3],  
27 or muscle activities in motor execution [4], even sophisticated athletes and musicians cannot repeat the

28 same movements. Our motor systems somehow tame those variabilities to achieve the desired movements  
29 [5]. Another difficulty is a large degree of freedom (DoF) inherent in our motor system [1, 6]. The number  
30 of joints, muscles, and neurons are more than necessary to achieve the desired movements, resulting in  
31 an infinite number of joint configurations, muscle activities, and neural activities that can correspond to  
32 the desired movement [7-10]. Our motor systems somehow resolve those difficulties (i.e., variability and  
33 a large DoF) and generate the desired movements.

34 Although it remains unclear how we tame movement variability, a possible answer is the decomposition  
35 of motor variability into task-relevant and task-irrelevant variabilities. We compensate for a portion of  
36 motor variability that is relevant to achieve the desired movements (i.e., task-relevant variability) [11-15]  
37 - simultaneously, we do not significantly compensate for a portion of the variability that is irrelevant  
38 to achieve the desired movements (i.e., task-irrelevant variability). The compensation of task-relevant  
39 variability can be observed in movement kinematics [11-14], muscle activities [16, 17], and neural activities  
40 [15]. This striking feature of our motor variability enables the achievement of the desired movements in  
41 the presence of movement variability.

42 Several studies have developed techniques to evaluate task-relevant and task-irrelevant variabilities.  
43 The uncontrolled manifold (UCM) evaluates the task-relevant and task-irrelevant variabilities (mainly)  
44 in joint angles and angular velocities. The method focuses on kinematic parameters relevant to task  
45 achievements, such as hip joint position in stand-and-sit motion [11] or hand position in arm-reaching  
46 movements [18]. The Jacobian matrix, the derivatives of those kinematic parameters concerning joint  
47 angles or angular velocities, enables the definition of the null space around the joint angles or angular  
48 velocities averaged across trials. The variability along the null space can be defined as the task-irrelevant  
49 variability. Those previous studies have revealed that the task-relevant variability of joint angles and  
50 angular velocities is less than the task-irrelevant variability. Notably, the UCM focused on forward  
51 kinematics that map joint angles and angular velocities into joint positions and velocities in the external  
52 coordinate. In contrast, tolerance, noise, and covariation analysis (TNC) [13] and goal-equivalent manifold  
53 analysis (GEM) [14] focused on task functions that define the relationship between kinematic parameters  
54 and task performance. For example, a thrown dart or ball can be modeled as a parabola. When the  
55 release position and velocity in the vertical axis are  $p$  and  $v$ , respectively, the maximum height of the  
56 released dart or ball can be written as  $h = p + \frac{v^2}{2g}$ , where  $g$  is the gravitational acceleration. When  
57 controlling  $h$  is a task, the relation among  $h$ ,  $p$ , and  $v$  can be task function. For example, with a small  
58 value  $d$  (i.e.,  $d^2 \simeq 0$ ), a slight change in the release position  $p + \frac{v}{g}d$  and the release velocity  $v - d$  does not  
59 cause any change in  $h$ ; thus, the variability along these slight changes to be regarded as the task-irrelevant  
60 variability. TNC and GEM evaluate the task-relevant and task-irrelevant variabilities based on the task  
61 functions.

62 Those techniques have pros and cons. UCM enables the evaluation of motion sequence, but it does  
63 not consider the task function. The framework is thus not always suitable for the situation when kine-  
64 matic parameters are nonlinearly relevant to task achievements, such as the quadratic function of  $v$   
65 in the parabolic mentioned above. Because forward kinematics are nonlinear functions of joint angles  
66 and angular velocities, UCM requires local linear approximation around representative joint angles or  
67 angular velocities based on the Jacobian matrix. Due to the linear approximation, UCM assumed the  
68 variability around the kinematics averaged across all the trials. The approximation results in difficulty  
69 simultaneously considering the motor variability when the averaged kinematics change, such as those  
70 before, during, and after motor learning (although it is possible to discuss those situations separately  
71 [18]). GEM also considers the local linear approximation of the nonlinear task function; thus, the method  
72 also considers the variability around the task parameters averaged across all the trials. Although GEM  
73 can deal with the task function, it is difficult to consider motion sequence in several cases. For example,  
74 to consider the motion sequence, the GEM framework needs to define how the dart or ball position and  
75 velocity 100 msec before the release are relevant to the maximum height in the example, as mentioned  
76 above. TNC enables the simultaneous discussion of the motor variability before, during, and after motor

77 learning because the framework captures the whole variability in a nonparametric manner without local  
78 linear approximation; however, TNC is not always suitable for considering motion sequence based on a  
79 similar reason to GEM - it requires an explicit definition of the task function. In total, each method has  
80 pros and cons; thus, no single framework can simultaneously evaluate task-relevant and task-irrelevant  
81 variabilities when the averaged kinematics or task parameters change while considering both the motion  
82 sequence and task function.

83 Motor variability has another striking feature: the variability is embedded in a low-dimensional space  
84 that is referred to as synergy [6, 19-22]. It is suggested that to overcome a larger DoF, our motor system  
85 controls not all the DoFs but only those in low-dimensional space. Synergy has been (mainly) discussed  
86 for kinematics data [20, 22-24] and EMG data [19, 21]. In both kinematics and EMG, low-dimensional  
87 space that can capture a high portion of motor variability has been found. Several methods have been  
88 developed to extract the synergy, such as principal component analysis (PCA) [20, 22], nonnegative  
89 matrix factorization [21, 25] or spatial-temporal decomposition of EMG data [19].

90 The motor variability thus has at least two characteristics: compensation of the task-relevant vari-  
91 ability and low-dimensional structure. Most of the techniques, however, deal with only one aspect.  
92 It is difficult to detect the low-dimensional structure of motor variability by the methods to evaluate  
93 task-relevant and task-irrelevant variabilities. Similarly, it is difficult to evaluate task-relevant and task-  
94 irrelevant variabilities by the techniques to extract low-dimensional structure of motor variability. Thus,  
95 the 1st principal component, the dimension that can explain the most significant portion of variabil-  
96 ity among all dimensions, is not always the most relevant or irrelevant to task performance. Although  
97 UCM has been used to extract synergy [8], the primary advantage of UCM is not the extraction of the  
98 low-dimensional structure but the evaluation of task-relevant and task-irrelevant variabilities. Although a  
99 few studies have focused on linear discrimination analysis (LDA) to discuss task-relevant low-dimensional  
100 space [26, 27], LDA enables only discrimination, e.g., success or failure of the movement [28], in contrast  
101 to TNC and GEM, which can discuss motor performance based on continuous performance value. In  
102 summary, few methods simultaneously quantify two striking features of movement variability.

103 Here, we propose a flexible and straightforward machine learning technique that can evaluate move-  
104 ment variability by unifying the advantages of previous techniques: our framework can evaluate not only  
105 task-relevant and task-irrelevant variabilities even when averaged kinematics or task parameters change  
106 (e.g., before, during, and after motor learning) while considering motion sequence and task function but  
107 also how each synergy is relevant to task performance by extending PCA. The current study relied on a  
108 ridge regression [29], a linear regression technique that is robust in the presence of measurement noise,  
109 has a definite relation to PCA, and can evaluate how the motion of each body part at each time is relevant  
110 to task performance in a data-driven manner [30]. Our technique can thus enable the identification of  
111 task functions in a data-driven manner without any explicit function such as the parabola or the forward  
112 kinematics. First, we formalize the dissociation of motion sequence data into task-relevant components  
113 and task-irrelevant components by extending a ridge regression. Second, we construct a novel experimen-  
114 tal paradigm to discuss the relation of a motion sequence to task performance based on goal-directed and  
115 whole-body movements. We further discuss motor adaptation in the current experimental setting. Third,  
116 we validate the decomposition of motion sequence data into task-relevant and task-irrelevant components  
117 based on our experimental data. Fourth, we clarify the relation between ridge regression and PCA, a  
118 popular method to extract the low-dimensional space of motor variability. In particular, we analytically  
119 reveal how each principal component is relevant to performance in the ridge regression. We also validate  
120 the analytical calculations based on our experimental data. Finally, we apply our method to motion  
121 sequence data in whole-body and goal-directed movements before and after motor adaptation. Because  
122 our method enables to discuss the modulation of movement variability before and after motor adaptation,  
123 we discuss the dependence of the modulation on the perturbation schedule.

## 124 Results

125 Downloading our program code on our website is possible.

126 **Linear regression.** The current study relied on linear regression to determine the relationship  
 127 between motion data  $\mathbf{X} \in \mathbb{R}^{T \times D}$  (the current study focused on the temporal sequence of joint angles  
 128 and angular velocities) and performance data  $\mathbf{d} \in \mathbb{R}^{T \times 1}$  following  $\mathbf{h} = \mathbf{X}\mathbf{w}$ , where  $T$  and  $D$  denoted the  
 129 number of trials and the number variables in the motion data,  $\mathbf{h} \in \mathbb{R}^{T \times 1}$  is the predicted performance,  
 130 and  $\mathbf{w} \in \mathbb{R}^{D \times 1}$  is the best linear coefficients to predict the performance [30].  $\mathbf{X}_t$ , the  $t$ th row of  $\mathbf{X}$  or  
 131 the motion data at the  $t$ th trial, consists of vectorized motion data (e.g., after measuring joint angles  
 132 of knee  $\mathbf{q}_{k,t} \in \mathbb{R}^{1 \times F}$  and hip  $\mathbf{q}_{h,t} \in \mathbb{R}^{1 \times F}$  for  $F$  time frames at the  $t$ th trial,  $\mathbf{X}_t = (\mathbf{q}_{k,t}, \mathbf{q}_{h,t})$ ). We  
 133 relied on a ridge regression to predict performance; the method enabled to predict the performance  
 134 with higher accuracy than the conventional method as mentioned below. Ridge regression is a linear  
 135 regression technique that is robust against observation noise, is applicable to data with multicollinearity  
 136 (see *Materials and Methods* for details). Although we relied on a ridge regression to estimate  $\mathbf{w}$ , the  
 137 following decomposition of input data into the task-relevant and task-irrelevant components could be  
 138 applied to any linear regression technique.

139 **Decomposition into task-relevant and task-irrelevant components.** After estimating the  
 140 best linear coefficients  $\mathbf{w}$  based on measured performance data  $\mathbf{y} \in \mathbb{R}^{T \times 1}$  and motion data  $\mathbf{X}$ , the  
 141 estimated  $\mathbf{w}$  enabled not only the prediction of performance but also the decomposition of motion data  
 142 into a task-relevant component  $\mathbf{X}_{\text{rel}}$  and task-irrelevant component  $\mathbf{X}_{\text{irr}}$ . By minimizing the cost function

$$\frac{1}{2}(\mathbf{X}\mathbf{w} - \mathbf{X}_{\text{rel}}\mathbf{w})^T(\mathbf{X}\mathbf{w} - \mathbf{X}_{\text{rel}}\mathbf{w}), \quad (1)$$

143 under the constraint  $\mathbf{X} \neq \mathbf{X}_{\text{rel}}$  to avoid the self-evident answer,  $\mathbf{X}_{\text{rel}}$  can be written as

$$\mathbf{X}_{\text{rel}} = \mathbf{X}\mathbf{w}\mathbf{w}^T(\mathbf{w}\mathbf{w}^T)^\dagger = \mathbf{X} \frac{\mathbf{w}\mathbf{w}^T}{|\mathbf{w}|^2}, \quad (2)$$

144 where  $(\mathbf{w}\mathbf{w}^T)^\dagger$  is a pseudo-inverse of  $\mathbf{w}\mathbf{w}^T$  and  $|\mathbf{w}| = \sqrt{\mathbf{w}^T\mathbf{w}}$ . The equality  $\mathbf{w}^T(\mathbf{w}\mathbf{w}^T)^\dagger = \frac{\mathbf{w}^T}{|\mathbf{w}|^2}$  holds  
 145 when  $\mathbf{w} \in \mathbb{R}^{D \times 1}$ . Under the decomposition  $\mathbf{X} = \mathbf{X}_{\text{rel}} + \mathbf{X}_{\text{irr}}$ ,  $\mathbf{X}_{\text{irr}}$  can be written as

$$\mathbf{X}_{\text{irr}} = \mathbf{X} - \mathbf{X}_{\text{rel}} = \mathbf{X} \left( \mathbf{I} - \frac{\mathbf{w}\mathbf{w}^T}{|\mathbf{w}|^2} \right), \quad (3)$$

146 where  $\mathbf{I} \in \mathbb{R}^{D \times D}$  is an identity matrix. Under the appropriate normalization (i.e., mean and standard  
 147 deviation of each component of  $\mathbf{X}$  and  $\mathbf{y}$  were set to be 0 and 1, respectively, see *Materials and Methods*  
 148 for details),  $\mathbf{X}_{\text{rel}}\mathbf{w} = \mathbf{X}\mathbf{w} = \mathbf{h}$  and  $\mathbf{X}_{\text{irr}}\mathbf{w} = 0$ , indicating that  $\mathbf{X}_{\text{rel}}$  and  $\mathbf{X}_{\text{irr}}$  denoted task-relevant  
 149 and task-irrelevant components under the framework of linear regression. An important point of this  
 150 framework is that it does not require any explicit function (e.g., forward kinematics such as in UCM or  
 151 task function such as in GEM and TNC) but require only data  $\mathbf{X}$  and  $\mathbf{y}$ .

152 Figs. 1A and 1B demonstrate typical examples of the decomposition when  $\mathbf{X}$  includes only 2 elements  
 153 and constrains the task by setting  $h = X_1 - X_2$  (i.e.,  $w_1 = 1$  and  $w_2 = -1$ ) to some certain values (e.g.,  
 154  $y = 2, 0, -2$  in the simulated task 1, 2, 3, respectively). Because the constrained task was one dimensional  
 155 and input data were two dimensional, an infinite patterns of  $\mathbf{X}$  values resulted in an identical  $h$  value. In  
 156 this case,  $\mathbf{X}_{\text{rel}} = \mathbf{X} \frac{1}{\sqrt{2}} \begin{pmatrix} 1 & -1 \\ -1 & 1 \end{pmatrix} = \frac{1}{\sqrt{2}}(X_1 - X_2, -(X_1 - X_2))$  and  $\mathbf{X}_{\text{irr}} = \mathbf{X} - \mathbf{X}_{\text{rel}}$ . The simulated  
 157 data points on the dotted line in Fig. 1B indicated  $\mathbf{X}_{\text{rel}}$ . On the dotted line, the data points can be  
 158 clearly separated into three parts corresponding to the simulated tasks 1, 2, and 3. In contrast  $\mathbf{X}_{\text{irr}}$   
 159 plotted on the solid line is not separated based on task.

160 **Goal-directed whole-body movements and motor adaptation.** The current study focuses  
 161 on goal-directed and whole-body movements in which subjects manage to achieve the desired movement

162 by controlling a large number of DoFs. We focus on a simplified version of whole-body movements:  
163 a vertical jump while crossing arms in front of the trunk (Fig. 2A). This goal-directed whole-body  
164 movement enabled us to focus on lower limb and trunk motions and assess task-relevant variability, task-  
165 irrelevant variability, and the low-dimensional spaces in which a high portion of the motor variability  
166 was embedded. We proposed a machine learning technique to simultaneously evaluate these features of  
167 variability while considering motion sequence and the relevance of each motion to jumping height.

168 Subjects stood in a fixed position and were instructed to look at a computer monitor located in front  
169 of them and perform a sub-maximum vertical jump according to a target height (40, 45, 50, 55, or 60%  
170 of the maximum jumping height of each subject, Fig. 2B, see *Materials and Methods* section for details).  
171 Three beeps sounded, and the subjects needed to perform the jump at the timing of the third beep. The  
172 interval between each beep was one second. At the beginning of each trial (i.e., one second before the  
173 first beep), the target height was indicated by a black bar displayed on a computer monitor. At the  
174 end of the  $t$ th trial, the actual jumping height  $k_t$  (the y-position of the marker attached to the back)  
175 was displayed as a blue cursor on the monitor, where  $t = 1, \dots, T$  and  $T$  was the number of trials to be  
176 analyzed. By manipulating the displayed jumping height (we called this manipulation as a perturbation  
177  $p_t$ ), it was possible to induce sensory prediction error between the predicted and actual jumping heights.  
178 This perturbation paradigm was similar to a protocol of motor gain adaptation as reported mainly in  
179 saccade and arm-reaching movements [31, 32]. We expected subjects to modify their motion sequences  
180 to minimize the sensory prediction error.

181 First, we determined whether the subjects could perform goal-directed whole-body movements in our  
182 experimental setting. In 50 baseline trials in experiment 1 (Fig. 2C), the target height pseudorandomly  
183 changed in each trial. There was a significant main effect of target height in jumping height (Fig. 2D,  
184 one-way repeated measure ANOVA,  $p = 6.114 \times 10^{-24}$ ). The subjects could thus perform goal-directed  
185 vertical jump depending on target height.

186 Second, we determined whether the subjects showed motor adaptation in the experimental setting.  
187 In 96 learning trials in experiment 1 (Fig. 2C), the subjects experienced perturbations once in every five  
188 trials; the perturbation was pseudorandomly set to  $p_t = 0.05$  or  $p_t = -0.05$  in every five trials and  $p_t = 0$   
189 in other trials (Figs. 3A and B). We observed the modification of jumping height after each perturbation  
190 (Fig. 3C, paired t-test,  $p = 0.0026$  for motor adaptation when  $p_t = 0.05$ ; and  $p = 0.0014$  for motor  
191 adaptation when  $p_t = -0.05$ ). Additionally, we confirmed whether fatigue influenced the adaptation by  
192 comparing the magnitudes of the modification in the former part of the learning trials to those in the  
193 latter part. There was no significant difference in the magnitudes of the modification between the former  
194 and the latter parts of the learning trials (paired t-test,  $p = 0.4382$ ). Motor adaptation could thus be  
195 observed in the goal-directed vertical jump without significant effect of fatigue.

196 **Validation of ridge regression and decomposition into task-relevant and task-irrelevant**  
197 **components.** The current study focuses on the evaluation of motor variability, especially task-relevant  
198 variability, task-irrelevant variability, and the relevance of low-dimensional structures to task performance,  
199 by extending ridge regression (the details of ridge regression were provided in *Materials and Methods*). We  
200 needed to validate the ridge regression in the current experimental setting before evaluating variability.  
201 Notably, we have already validated the efficiency of ridge regression to predict performance not only in  
202 jumping movements but also in throwing movements [30].

203 Ridge regression requires selecting input data because a careful selection of input data is indispensable  
204 to discussing the linear relation between input and output data. Prediction power is a sophisticated  
205 measure for selecting input data while avoiding overfitting [28]. The current study focused on prediction  
206 error between actual and predicted jumping height using 10-fold cross-validation. We compared the  
207 following three types of input data (see *Materials and Methods* for details). The first candidate is  
208 joint angles  $\{q_i\}$  and angular velocities  $\{\dot{q}_i\}$ :  $\mathbf{X} = (\{q_i\}, \{\dot{q}_i\})$ , where  $\{a_i\} = (a_1, a_2, a_3, a_4)$  and  $\dot{q}_i$   
209 denotes the derivative of  $q_i$  concerning time (the definitions of each  $q_i$  are given in Fig. 2A). The second  
210 candidate is the functions of  $q_i$  and  $\dot{q}_i$ , which describe the position and velocity of back joint in the y-axis

211 and are relevant to jumping height:  $\mathbf{X} = (\{\sin q_i\}, \{\dot{q}_i \cos q_i\})$ . The third candidate is the functions  
212 describing the jumping height based on parabolic approximation:  $\mathbf{X} = (\{\sin q_i\}, \{\dot{q}_i \dot{q}_j \cos q_i \cos q_j\})$ ,  
213 where  $\{a_i a_j\} = (a_1^2, a_1 a_2, a_1 a_3, a_1 a_4, a_2^2, a_2 a_3, a_2 a_4, a_3^2, a_3 a_4, a_4^2)$ . By comparing these three candidates,  
214 we found that the first candidate (i.e.,  $\mathbf{X} = (\{q_i\}, \{\dot{q}_i\})$ ) showed the lowest prediction error (Fig. 4A). In  
215 particular, the first candidate, with four-time frames before release, yielded the lowest prediction error.  
216 If the prediction error equals 1, the method cannot predict the output data. In contrast, if the prediction  
217 error equals 0, the method can predict the output data with 100% accuracy. As shown in Fig. 4A, the  
218 first candidate with four-time frames resulted in a prediction error of 0.174, indicating that the ridge  
219 regression enables prediction of jumping height with an  $82.6 \pm 2.28\%$  (mean  $\pm$  standard error of the mean  
220 [s.e.m.],  $N=13$ ) accuracy in the current setting. In the following, we refer to the first candidate with  
221 four-time frames as the motion sequence. In our experimental setting with goal-directed vertical jump,  
222  $\mathbf{X}$  included 32 elements in each trials ( $4(\text{dim}) \times 4(\text{time frames})$ ) for  $\{q_i\}$ , and  $4(\text{dim}) \times 4(\text{time frames})$  for  
223  $\{\dot{q}_i\}$ . Because the parabolic approximation of jumping height ( $h = p + \frac{v^2}{2g}$ , the detailed definition is  
224 given in the *Introduction*) enables prediction of the jumping height with a  $76 \pm 2.96\%$  (mean  $\pm$  s.e.m.,  
225  $N=13$ ) accuracy (purple line in Fig. 4A), the ridge regression enables prediction of jumping height with  
226 higher accuracy than the approximation. The reasons the ridge regression shows higher prediction power  
227 are its robustness against observation noise and consideration of the motion sequence rather than the  
228 representative motion data at a single time frame (i.e., the position and velocity of the hip joint only at  
229 the time of release). The ridge regression thus enables the discussion of the linear relation between the  
230 motion sequence and jumping height with appropriate precision.

231 **Variability in task-relevant and task-irrelevant space.** We calculated the task-relevant and  
232 task-irrelevant variabilities in a goal-directed vertical jump based on both the ridge regression and the  
233 decomposition of input data into task-relevant and task-irrelevant dimensions. The current study cal-  
234 culated the variability (variance) of each element of  $\mathbf{X}_{\text{rel}}$  and  $\mathbf{X}_{\text{irr}}$  in focused trials (see *Materials and*  
235 *Methods* for details). The representative values of the variability, task-relevant variability  $\text{Var}_{\text{rel}}$  and  
236 task-irrelevant variability  $\text{Var}_{\text{irr}}$ , were calculated by averaging the variability across all the elements.

237 We found that the task-relevant variability was smaller than the task-irrelevant variability in all par-  
238 ticipants ( $N = 13$ , red dots in Fig. 4B). Because previous methods, such as the UCM (blue crosses) and  
239 GEM (green crosses), found similar task-relevant and task-irrelevant variabilities, our method enabled  
240 the extraction of lower task-relevant variability and higher task-irrelevant variability. Because the nor-  
241 malization procedures of our method and previous methods differ (see *Materials and Methods*), there  
242 was a slight difference in the calculated variabilities. Our methods can quantify task-relevant and task-  
243 irrelevant variabilities by considering the motion sequence and the relevance of the sequence to the task.  
244 Our method does not require any explicit task function, such as the parabolic approximation of jumping  
245 height, but it determines the relevance of the motion sequence to the task in a data-driven manner.  
246 Further, our method is robust against observation noise due to the properties of ridge regression.

247 **Relevance of each principal component to task performance.** Movement variability shows not  
248 only less task-relevant variability than task-irrelevant variability but also a low-dimensional structure. The  
249 current study compares our method to PCA, a conventional method to extract low-dimensional structure.  
250 Because the low-dimensional structure is considered to represent some features of motor control, it can  
251 be expected to be correlated to task performance. We decomposed the motion sequence  $\mathbf{X}$  into principal  
252 components (PCs, i.e., eigenvectors) and calculated the correlation of each PC to jumping height (see  
253 *Materials and Methods* for detail). In our setting, there was no clear relation between the number of  
254 PCs for the decomposition and the correlation between the decomposed motion data and performance  
255 data (Fig. 4C). If averaged across all participants, the 1st PC could explain approximately 30% of  
256 the movement variability (blue line in Fig. 4D). Corresponding to the explained movement variability,  
257 the 1st PC showed the highest correlation to jumping height (red line in Fig. 4D) if averaged across all  
258 participants. In a typical subject, however, the 2nd rather than the 1st PC showed the highest correlation  
259 to jumping height (red line in Fig. 4E). This typical subject was not an exception; Fig. 4F shows the PC

260 number with the highest correlation to jumping height. In 6 out of 13 subjects, the 1st PC showed the  
261 highest correlation to performance. In 3 out of 13 subjects, the 2nd PC showed the highest correlation,  
262 and the 3rd PC showed the highest in 4 out of 13 subjects. These results indicate that the explained  
263 movement variability did not correspond to the relevance to task performance.

264 Ridge regression enabled the prediction of jumping height with higher accuracy than PCA (red line  
265 in Fig. 4C) because the ridge regression weights each PC based on both the explained movement vari-  
266 ability and the task relevance. In PCA (or equivalently singular value decomposition (SVD)), the motion  
267 sequence at the  $t$ th trial is decomposed as  $\mathbf{X}_t = \sum_{i=1}^N \lambda_i u_{i,t} \mathbf{v}_i$ , where  $N$  is the number of PCs,  $\lambda_i$  is  
268 the  $i$ th eigenvalue corresponding to the  $i$ th PC  $\mathbf{v}_i$ , and  $u_{i,t}$  indicated how the  $i$ th PC appeared at the  
269 trial. The correlation of the  $i$ th PC to task performance was thus calculated based on  $u_{i,t}$ , and it did  
270 not reflect the relevance of the  $i$ th PC to task performance. In contrast, the ridge regression enables the  
271 prediction of task performance as  $h_t = \sum_{i=1}^N f(\lambda_i) \text{Corr}(u_{i,t}, y_t) u_{i,t}$ , where  $f(\lambda_i)$  is a sigmoidal function  
272 of  $\lambda_i$  and  $\text{Corr}(u_{i,t}, y_t)$  is the correlation between the contribution of the  $i$ th PC at the  $t$ th trial  $u_{i,t}$  and  
273 observed jumping height  $y_t$  (see *Materials and Methods* for details). The ridge regression thus enables  
274 the prediction of performance by weighting each PC based on both explained movement variability and  
275 task relevance. In other words, our method enables the consideration of the low-dimensional structure of  
276 movement variability by weighting each PC suitable for predicting task performance.

277 **Influence of motor adaptation on variability in the task-relevant and task-irrelevant di-**  
278 **mension.** An advantage of our method is its linearity, which enables the simultaneous comparison of  
279 the task-relevant and task-irrelevant variabilities among the conditions where mean kinematics or task  
280 parameters change (e.g., before, during, and after motor learning). It was previously unclear how task-  
281 relevant and task-irrelevant variabilities are modulated by motor adaptation. The modulation of these  
282 variabilities has been investigated for arm-reaching movements and motor adaptation to a constant per-  
283 turbation [5, 33]. Although there are some differences between adaptation to a constant perturbation and  
284 that to a gradually imposed perturbation, e.g., retention rate or awareness [34], the means by which those  
285 variabilities are modulated in the two types of adaptations have not been investigated. Further, it was  
286 previously unclear whether such modulation of variability could be observed in whole-body movements.  
287 Our method without linear approximation enabled the discussion of how task-relevant and task-irrelevant  
288 variabilities are modulated before and after motor adaptation in whole-body movements. We thus applied  
289 our method to motor adaptation in response to constant and gradually imposed perturbations.

290 In experiment 2 (two days for each subject), subjects experienced gradually increased or decreased  
291 perturbations. Each subject underwent ten learning trials without any perturbation. The perturbation  
292 was gradually imposed for ten trials and was set to 0.05 or -0.05 for ten trials (Figs. 5A, B). The gradually  
293 imposed perturbation required not abrupt but gradual compensation (i.e., subjects were required to  
294 modify their motions slightly in each trial). In a total of 30 trials, the target height was set to 50% of  
295 the subject's maximum jumping height. Subjects who experienced a  $p_t > 0$  on the first day experienced  
296 a  $p_t < 0$  on the 2nd day and vice versa. The order of perturbation was counterbalanced across subjects.  
297 The subjects could adapt to the gradually increased or decreased perturbations (Fig. 5C).

298 In experiment 3, the subjects experienced constant perturbations. Each subject underwent five learn-  
299 ing trials without any perturbation. The perturbation was set to 0.05 or -0.05 for 15 trials, 0 for ten trials  
300 for washout and -0.05 or 0.05 for 15 trials (Figs. 5D, E). In contrast to experiment 2 where the pertur-  
301 bation was gradually imposed, subjects were required to modify their motions abruptly in experiment 3.  
302 Subjects who experienced a  $p_t = 0.05$  on the 6th-20th trials experienced a  $p_t = -0.05$  on the 31st-45th  
303 trials and vice versa. The order of perturbation was counterbalanced across subjects. In a total of 45  
304 trials, the target height was set to 50% of the subject's maximum jumping height. In both experiments  
305 2 and 3, the subjects adapted to the perturbations (Fig. 5F).

306 We calculated the task-relevant and task-irrelevant variabilities before and after adaptation in exper-  
307 iments 2 and 3 (Figs. 6A and B). For task-relevant variability, there was no significant difference before  
308 and after the adaptation to gradually increasing or decreasing perturbations (blue dots in Fig. 6A,  $N =$

309 13, Wilcoxon signed rank test,  $p = 0.1909$ ). In contrast, in adapting to a constant perturbation, there  
310 was a significant difference in task-relevant variability before and after adaptation (red dots in Fig. 6A,  
311  $N = 13$ , Wilcoxon signed rank test,  $p = 0.0034$ ). For task-irrelevant variability, there was no significant  
312 difference before and after adaptation to gradually increasing or decreasing perturbations (blue dots in  
313 Fig. 6B,  $N = 13$ , Wilcoxon signed rank test,  $p = 0.1677$ ) and a constant perturbation (red dots in  
314 Fig. 6B,  $N = 13$ , Wilcoxon signed rank test,  $p = 0.3396$ ). These results could be interpreted based on  
315 a simulated and two-dimensional case similar to that shown in Fig. 1 (Figs. 6C, D). In adapting to  
316 perturbations, the subjects needed to modify their output (i.e., jumping height) by determining an ap-  
317 propriate input (i.e., motion sequence). In adapting to gradually increasing or decreasing perturbations,  
318 there was no modulation in both task-relevant and task-irrelevant variabilities (Fig. 6C). In adapting to  
319 a constant perturbation, the task-relevant variability increased, while the task-irrelevant variability was  
320 not be modulated (Fig. 6D). Notably, Figs. 6C and 6D were not real data but simulated examples to  
321 interpret our results. In summary, the modulation of task-relevant variability depends on the schedule of  
322 perturbation.

## 323 Discussion

324 We proposed a flexible and straightforward machine learning technique that quantified task-relevant  
325 variability, task-irrelevant variability, and the relevance of each principal component to task performance  
326 in a noise-robust manner while considering motion sequence and how each motion sequence was relevant to  
327 task performance (Fig. 4). Our method can find the relevance of each motion sequence to performance  
328 (i.e., task function) in a data-driven manner; our method does not require any explicit task function,  
329 such as the parabolic approximation of jumping height. Further, our method does not require any linear  
330 approximation, which enables the simultaneous consideration of the variabilities when the kinematics or  
331 task parameters averaged across trials change (e.g., before, during, and after adaptation). By applying  
332 our method to the motion sequence before and after motor adaptation, we found that the perturbation  
333 schedules affected the modulation of movement variability in motor adaptation (Figs. 6A and 6B). These  
334 advantages enable the methods to be flexibly applied to a wide range of goal-directed movements.

335 Our method can be regarded as a generalized method including UCM and GEM. When we define  
336  $X_i = q_i - \bar{q}_i$  ( $q_i$  and  $\bar{q}_i$  indicated the  $i$ th joint angle and the averaged joint angle across all the focused trials,  
337 respectively [ $i=1, \dots, 4$  in our setting]), and  $X_{i+4} = \dot{q}_i - \bar{\dot{q}}_i$  ( $\dot{q}_i$  and  $\bar{\dot{q}}_i$  indicated the joint angular velocity  
338 and averaged joint angular velocity across all the focused trials, respectively), and the corresponding  
339 weight  $\mathbf{w}$  as the Jacobian matrix of forward kinematics  $p = p(\mathbf{q})$  (the back position) and  $v = v(\mathbf{q}, \dot{\mathbf{q}})$   
340 (the back velocity) around the averaged joint angles and angular velocities across all the focused trials  
341  $\bar{\mathbf{q}}, \bar{\dot{\mathbf{q}}}$ , our framework corresponds to UCM. When we define  $w_1 = 1, w_2 = \frac{\bar{v}}{g}, X_1 = p - \bar{p}$ , and  $X_2 = v - \bar{v}$ ,  
342  $h = \mathbf{X}\mathbf{w} = p - \bar{p} + \frac{\bar{v}}{g}(v - \bar{v})$ , our framework corresponds to the GEM in the cases when the task function  
343 can be defined by the parabolic function, where  $g$  denotes the gravitational acceleration. Because the  
344 UCM and GEM can be regarded as a special case of our method, our method can be considered as a  
345 generalized version of those methods.

346 Another advantage of our method is the ability to select appropriate input based on predictive power  
347 (Fig. 4A). The predictive power also enables the selection of a proper coordinate to define the task  
348 performance. A previous study has demonstrated that the UCM and TNC frameworks are sensitive  
349 and insensitive to how to select the coordinate (e.g., either relative or absolute angle), respectively [35].  
350 Our framework is likely sensitive to how to choose the coordinate; however, in contrast to the UCM  
351 framework, our method enables the selection of the appropriate coordinate for discussing the relationship  
352 between motion and performance based on predictive power. Although we considered one-dimensional  
353 performance in the current study (i.e., jumping height), two-dimensional performance requires the defi-  
354 nition of an appropriate coordinate to discuss performance [30, 36]. Predictive power plays a vital role  
355 in selecting the proper coordinate not only in motion but also in the performance space [30]. How to



356 select the length of time frames is another crucial problem (Fig. 4A). In our data, the motion data with  
357 four-time frames (approximately 33 ms) was chosen for the best predictive power. Although the motion  
358 data with four-time frames sound motion fragments rather than motion sequences, our method can be  
359 applied independently of the length of time frames. In our case, four-time frames were chosen to increase  
360 the predictive power.

361 Although we compared our method to UCM and GEM (Fig. 4B), we needed to compare it to the  
362 TNC method [13,37], the other method used to quantify motor variability from a different perspective.  
363 TNC enables the extraction of three types of information from motion data: T-cost, which quantifies  
364 how the mean motion data deviate from the optimal motion; N-cost, which quantifies how the motor  
365 variability deviates from the optimal variability; C-cost, which quantifies how the covariance among  
366 motion data deviates from the optimal covariance. Although the TNC does not consider task-relevant  
367 and task-irrelevant variabilities, it can quantify other interesting features (i.e., T-, N-, C-costs) embedded  
368 in motion data and variations of those costs during the learning process. Due to the computational cost,  
369 we could not apply the TCN method to our data. The TCN requires a grid search in the calculation  
370 of T-cost. Because the number of the grid was 200 and that of focused variables was eight in our case  
371 (four joint angles and angular velocities), it required  $200^8$  calculations. Due to this too burdensome  
372 computational cost in calculating not only T-cost but also C-cost, we could not apply the TNC method  
373 to our case. When the number of focused variables is two, the TNC could be a promising method and  
374 work well [13,37].

375 A potential extension of our method is to yield a state-space model for motor adaptation during  
376 whole-body movements. The state-space model was previously proposed as a model of motor adaptation  
377 mainly in arm-reaching movements [38-46]. In the current study, the modification of jumping height at  
378 the  $t$ th trial,  $h_t - h_{t-1}$ , was significantly correlated with the error,  $e_{t-1}$ , caused by perturbation and  
379 motor noise (in experiment 1, the correlation between  $h_t - h_{t-1}$  and  $e_{t-1}$  averaged across all participants  
380 was 0.5118 and  $p < 0.01$  for all the participants). The state-space model of jumping height can thus be  
381 written as  $h_t = h_{t-1} + \eta e_{t-1}$ , where  $\eta (> 0)$  is the learning rate. The jumping height  $h_t$  was predicted  
382 well by  $h_t \simeq \mathbf{X}_t \mathbf{w} = \mathbf{X}_{\text{rel},t} \mathbf{w}$ , which enabled us to approximately rewrite the state-space model as  
383  $\mathbf{X}_{\text{rel},t} \mathbf{w} = \mathbf{X}_{\text{rel},t-1} \mathbf{w} + \eta e_{t-1}$ . The model indicated that the jumping height was modified via modifying  
384 the motion sequence in the dimension along  $\mathbf{w}$ . Because this is a possible future extension of our approach,  
385 we need to further investigate the above-mentioned frameworks.

386 An advantage of our method is the linearity (i.e.,  $\mathbf{h} = \mathbf{X} \mathbf{w}$ ) in contrast to nonlinearity inherent in our  
387 body dynamics. A likely explanation for why linear regression works well is by analogy with the motor  
388 primitive framework, a successfully used framework in motor adaptation with goal-directed arm-reaching  
389 movements [38-46]. In this framework, a nonlinear motor command  $u$  is modeled as the linear weighted  
390 sum of nonlinear neural activities  $\mathbf{A}$ ;  $u = \sum_i W_i A_i$  and  $W_i$  are modified to minimize the movement error  
391 between the actual hand position and the desired movement position. When  $A_i$  is a nonlinear function of  
392 the desired movement and appropriately high-dimensional, nonlinear motor commands can be generated  
393 by appropriate linear combinations of nonlinear neural activities, which has been theoretically validated in  
394 the framework of a basis function network [47]. Motion data  $\mathbf{X}$  can be a nonlinear function of movement  
395 performance because our body dynamics are nonlinear. Additionally, the motion data are appropriately  
396 high-dimensional (32 dimensions for 1-dimensional performance). Thus, an appropriate linear summation  
397  $\mathbf{X} \mathbf{w}$  could predict the actual movement performance, which resulted in an appropriately estimated  $\mathbf{w}$   
398 that represented the relevance of motion elements to performance.

399 We relied on a simple linear regression (i.e., ridge regression). It is possible to use a more complicated  
400 machine learning technique, such as a mixture model [28, 48-50], sparse regression technique [51], or non-  
401 linear regression technique [52]. We have shown that a nonlinear regression technique, such as Gaussian  
402 process regression, is not effective in predicting performance based on motion data [30], likely because the  
403 number of data is limited. Although sparse regression, nonlinear regression, or a mixture model can show  
404 better predictive performance if the number of the data is high enough in general, it is difficult to find

405 certain relations between the principal components and estimated parameters via those methods. Ridge  
406 regression enables the determination of not only task-relevant and task-irrelevant variabilities but also  
407 the relevance of each PC to performance. Because some previous studies have discussed the relevance of  
408 each PC to performance [53,54], it could be a promising research topic to evaluate the functional roles of  
409 low-dimensional structured from a different viewpoint.

410 To our knowledge, only a few studies have investigated how variability is modulated through motor  
411 adaptation [5, 33]. A previous study clarified that the variability is modulated after motor adaptation  
412 by utilizing a constant force field [33]. To our knowledge, it was not clarified whether the perturbation  
413 schedule affected the modulation. The current study suggests that the perturbation schedule changes the  
414 modulation of variability (Figs. 6A and B). Because the variability can facilitate exploration [33], the  
415 current study also suggests that constant perturbations facilitate exploration in task-relevant space and  
416 that gradually applied perturbations do not affect the exploration. Recent studies have suggested that  
417 the variability plays essential roles in sports performance [55], injury prevention [56], and the development  
418 of children with developmental coordination disorder [57]. The current result provides a hint about how  
419 to assist those functions through the facilitation of the exploration using false feedback.

## 420 Materials and Methods

421 **Participants.** Thirteen healthy volunteers (aged 18-22 years, two females) participated in all of our  
422 experiments. On the first day, the participants underwent ten practice trials and 160 baseline trials  
423 with pseudorandomly changing targets (40%, 45%, 50%, 55%, or 60% of the maximum jump height)  
424 and became accustomed to the experimental setting. At the second, third, fourth, and fifth days (not  
425 consecutive), they joined experiments 1, 2, and 3. They joined experiment 2 for two days. All participants  
426 were informed of the experimental procedures and their confirmation with the Declaration of Helsinki, and  
427 all participants provided written informed consent before the initiation of the experiments. All procedures  
428 were approved by the ethics committee of the Tokyo University of Agriculture and Technology.

429 **Data acquisition and processing.** Jumping motions were recorded at 120 Hz using six cameras  
430 (Optitrack Flex 13, NaturalPoint Inc., Corvallis, Oregon). Markers were attached to the back (TV10),  
431 right hip joint (Femur greater Trochanter), right knee (Femur Lateral Epicondyle and Femur Medial  
432 Epicondyle), right heel (Fibula Apex of Lateral Malleolus and Tibia Apex of Medial Malleolus), and  
433 right toe (Head of 2nd Metatarsus) of the participants. Marker position data were filtered using a 12th-  
434 order, 10 Hz zero-phase Butterworth filter using MATLAB 2016a. Joint angles between the right toe  
435 and heel ( $q_1$ ), right heel and shank ( $q_2$ ), right shank and thigh ( $q_3$ ), and right thigh and trunk ( $q_4$ )  
436 were calculated in the sagittal plane (Fig. 2A). Because the current study focused on a vertical jump  
437 while crossing arms in front of the trunk, it was possible to focus only on lower limb and trunk motions.  
438 Throughout the current study, we focused on the four-link model of the lower limbs in the sagittal plane.

439 Release timing was detected based on the moment at which the vertical toe position exceeded 10% of  
440 the maximum height in each trial. The predictive power was calculated using various time-bin lengths  
441 including the release timing (Fig. 4A). When the time bin length was four, the fourth time frame  
442 corresponded to the release timing, the third time frame corresponded to one time frame before the  
443 release timing, and the other time frames followed accordingly.

444 **Experimental setup.** At the beginning of each trial, the subjects were instructed to stand at a  
445 fixed position. In each trial, subjects listened to three beeps separated by one-second intervals; the first  
446 beep indicated the start of each trial, and the subjects were required to jump at the timing of the third  
447 beep.

448 We measured the position of the marker attached to the subject's back using MATLAB at 30 Hz. In  
449 front of the subject (1.5 meters ahead, 1.7 meters above the floor), there was a monitor to display a blue  
450 cursor that indicated the height of the marker attached to subject's back and a black bar that indicated  
451 target height (Fig. 2B). Those cursors and bars were displayed one second before the first beep sounded.

452 The blue marker could move only in the vertical axis because the current study focused on the vertical  
 453 height of the jumping motion. The marker position at time  $s$  in the  $y$ -axis (Fig. 2A),  $k_s$ , was displayed  
 454 on the monitor after being normalized for each subject as  $k_s = \frac{\hat{k}_s - k_0}{k_{\max} - k_0}$ , where  $\hat{k}_s$  is the marker position  
 455 without normalization,  $k_0$  indicates the initial marker position that was evaluated at an upright standing  
 456 position in each trial, and  $k_{\max}$  indicates the jumping height with maximum effort in each subject (Fig.  
 457 2C). For the two trials that required the subjects to jump with maximum effort, there was no cursor  
 458 feedback. One second before the first beep,  $k_s = 0$ , the blue circle was displayed on the black baseline on  
 459 the monitor. Additionally, the target height  $d$  was indicated by a black line. Before the baseline trials,  
 460 the subjects underwent ten practice trials. In those trials, the marker position in each time frame was  
 461 displayed on the monitor and  $d$  was pseudorandomly chosen from 0.40, 0.45, 0.50, 0.55, or 0.60 (each  
 462 value was randomly chosen only once in every five trials). This method enabled the subjects to become  
 463 acquainted with the experimental setting by confirming the motion trajectory of the marker attached to  
 464 their back. In baseline trials, the marker position was displayed only at the start and end of each trial.  
 465 One second before the first beep, the cursor was displayed on baseline position, and a black line was  
 466 corresponding to  $d$  was displayed as pseudorandomly chosen from 0.40, 0.45, 0.50, 0.55, or 0.60. At the  
 467 end of each trial, the cursor was displayed at the maximum value of  $k_s$  within each trial (i.e.,  $\max k_s$ ),  
 468 which indicated jumping height (Fig. 2B). When the subjects achieved a jumping motion that was close  
 469 to the target height ( $|d - \max k_s| < 0.02$ ), they heard a coin-getting sound to indicate that the jumping  
 470 motion was successful. After the baseline trials, the subjects underwent 96 learning trials in experiment  
 471 1, 30 trials in experiment 2 (the same set of practice and main trials was imposed for two days), and 45  
 472 trials in experiment 3.

473 We utilized a perturbation paradigm to investigate how subjects modify their jumping motion via  
 474 experiencing sensory prediction errors. For trials with perturbation  $p$ , the position of the cursor was  
 475 displayed at  $\max k_s + p$ . The subjects needed to modify their jumping motion to achieve a lower (when  
 476  $p > 0$ ) or higher jumping height (when  $p < 0$ ). When the displayed jumping height was close to the  
 477 target height ( $|d - (\max k_s + p)| < 0.02$ ), the subjects heard a coin-getting sound to indicate that the  
 478 jumping motion was successful.

479 **Task-relevant and task-irrelevant variabilities** Under the condition  $\mathbf{X} = \mathbf{X}_{\text{rel}} + \mathbf{X}_{\text{irr}}$  (see *Results*  
 480 for details), the variance of the  $i$ th component of  $\mathbf{X}$ ,  $X_i$ , can be calculated as

$$\text{Var}(X_i) = \frac{1}{T} \sum_{t=1}^T X_{i,t}^2 = \frac{1}{T} \sum_{t=1}^T (X_{i,t}^{\text{rel}} + X_{i,t}^{\text{irr}})^2 = \text{Var}(X_i^{\text{rel}}) + \text{Var}(X_i^{\text{irr}}) + 2\text{Cov}(X_i^{\text{rel}}, X_i^{\text{irr}}), \quad (4)$$

481 where  $X_{i,t}$  is  $X_i$  at the  $t$ th trial,  $X_{i,t}^{\text{rel}}$  is the  $i$ th component of  $\mathbf{X}^{\text{rel}}$  at the  $t$ th trial,  $X_{i,t}^{\text{irr}}$  is the  $i$ th component  
 482 of  $\mathbf{X}^{\text{irr}}$  at the  $t$ th trial, and  $\text{Cov}(X_i^{\text{rel}}, X_i^{\text{irr}})$  is the covariance between  $X_i^{\text{rel}}$  and  $X_i^{\text{irr}}$ . Notably, in the  
 483 current experimental setting,  $\text{Cov}(X_i^{\text{rel}}, X_i^{\text{irr}})$  in the analyzed trials was close to 0. We thus considered  
 484 only  $\text{Var}(X_i^{\text{rel}})$  and  $\text{Var}(X_i^{\text{irr}})$ .

485 **Ridge regression** The ridge regression enabled us to determine the best one-dimensional linear space  
 486  $\mathbf{w} \in \mathbb{R}^{D \times 1}$  in the input data  $\mathbf{X} \in \mathbb{R}^{T \times D}$  to predict the output data  $\mathbf{y} \in \mathbb{R}^{T \times 1}$  by minimizing the cost  
 487 function:

$$E = \frac{1}{2}(\mathbf{y} - \mathbf{X}\mathbf{w})^T(\mathbf{y} - \mathbf{X}\mathbf{w}) + \frac{\lambda}{2}\mathbf{w}^T\mathbf{w}. \quad (5)$$

488 The first term on the right-hand side indicates the fitting error, the second term indicates the regulariza-  
 489 tion of  $\mathbf{w}$ , and  $\lambda$  is a regularization parameter. The current study determined  $\lambda$  to minimize the prediction  
 490 error based on a 10-fold cross validation, which enabled us to avoid overfitting [28]. Overfitting, which  
 491 can appear without any regularization, leads to the selection of a model that is more complicated than  
 492 the true one. Minimization of the cost function concerning  $\mathbf{w}$  leads to the optimal value for  $\mathbf{w}$ :

$$\mathbf{w}^* = (\mathbf{X}\mathbf{X}^T + \lambda\mathbf{I})^{-1} \mathbf{X}^T \mathbf{y}, \quad (6)$$

493 where  $\mathbf{I}$  was an identity matrix. When  $\mathbf{X}\mathbf{X}^T$  has multicollinearity, it is difficult to calculate the inverse  
 494 of  $\mathbf{X}\mathbf{X}^T$  because of the rank deficit. The identity matrix with a regularization parameter  $\lambda$  enables to  
 495 calculate the inverse of  $\mathbf{X}\mathbf{X}^T + \lambda\mathbf{I}$  and predict output data with a certain accuracy.

496 The ridge regression showed high prediction power under the existence of measurement noise in  $\mathbf{X}$ .  
 497 Under the existence of measurement Gaussian noise  $\boldsymbol{\xi}$  with a mean of 0, the standard deviation is  $\sigma_o$ ,  
 498 covariance is 0, and the cost function averaged across all the possible noise can be written as

$$\langle E \rangle = \frac{1}{2}(\mathbf{y} - \mathbf{X}\mathbf{w})^T(\mathbf{y} - \mathbf{X}\mathbf{w}) + \frac{\sigma_o^2}{2}\mathbf{w}^T\mathbf{w}. \quad (7)$$

499 The equivalence between equations (5) and (7) indicates that the ridge regression enabled the selection of  
 500 the best  $\mathbf{w}$  to predict  $\mathbf{y}$  under the existence of measurement noise while avoiding overfitting. The equiv-  
 501 alence also suggests that the regularization parameter  $\lambda$  corresponds to the variance of the observation  
 502 noise  $\sigma_o^2$ .

503 The ridge regression enabled the estimation of an appropriate  $\mathbf{w}$  based on the normalized  $\mathbf{y}$  and  $\mathbf{X}$ ,  
 504 i.e., the mean and standard deviation of  $\mathbf{y}$  and  $\mathbf{X}$  should be normalized to be 0 and 1, respectively;  
 505  $\frac{1}{T}\sum_{t=1}^T y_t = 0$ ,  $\frac{1}{T}\sum_{t=1}^T y_t^2 = 1$ ,  $\frac{1}{T}\sum_{t=1}^T X_{i,t} = 0$ , and  $\frac{1}{T}\sum_{t=1}^T X_{i,t}^2 = 1$  ( $d = 1, \dots, D$ ). All the results in  
 506 the current study depended on the normalized data. Without normalization,  $w_i$  is estimated to be large  
 507 when  $X_{i,t}$  shows small fluctuations and vice versa, although regularization with parameter  $\lambda$  was imposed  
 508 equally to all the  $w_i$ ; therefore, normalization, especially in  $\mathbf{X}$ , is indispensable for estimating appropriate  
 509  $\mathbf{w}$ . Notably, the normalization did not affect interpretation at all because it was possible to restore the  
 510 original unnormalized data by adding the original mean  $m_i = \frac{1}{T}\sum_{t=1}^T X_{i,t}^{\text{original}}$  and multiplying the  
 511 original standard deviation  $\sigma_i = \sqrt{\frac{1}{T}\sum_{t=1}^T (X_{i,t}^{\text{original}})^2 - m_i^2}$ . To satisfy  $\sum_{i=1}^D w_i X_{i,t} = \sum_{i=1}^D \tilde{w}_i X_{i,t}^{\text{original}}$ ,  
 512  $\tilde{\mathbf{w}}$ , where  $\mathbf{w}$  corresponds to unnormalized data, should be divided by  $\sigma_i$  ( $\tilde{w}_i = \frac{w_i}{\sigma_i}$ ) and  $\sum_{i=1}^D \tilde{w}_i m_i$  should  
 513 be subtracted. In total, the normalization is indispensable for estimating an appropriate  $\mathbf{w}$ ; however, it  
 514 did not affect the results at all.

515 **Parabolic representation of jumping height, three candidates of input data, the UCM**  
 516 **and GEM** The vertical position of the marker attached to the subject's back determined the jumping  
 517 height in the current study. We expected that the jumping height could be predicted well based on the  
 518 back position  $p$  and velocity  $v$  of the marker at the release timing as follows

$$h = p + \frac{v^2}{2g}, \quad (8)$$

519 where  $g \simeq 9.8(m/s^2)$ . In the joint angle representation,  $p$  and  $v$  were written as follows:

$$p = \sum_{i=1}^4 l_i \sin q_i \quad (9)$$

520 and

$$v = \sum_{i=1}^4 l_i \dot{q}_i \cos q_i, \quad (10)$$

521 where  $l_i$  indicated the length of the  $i$ th limb (i.e.,  $l_1$  indicated the length between right toe and heel,  $l_2$   
 522 indicated the length between right heel and knee,  $l_3$  indicated the length between right knee and hip, and  
 523  $l_4$  indicated the length between hip and back). In the UCM (blue crosses in Fig. 4B), we calculated the  
 524 task-relevant and task-irrelevant variabilities based on equations (9) and (10).

525 Using the equations (9) and (10), the predicted jumping height  $h$  can be written as

$$h = \sum_{i=1}^4 l_i \sin q_i + \frac{1}{2g} \sum_{i=1}^4 \sum_{j=1}^4 l_i l_j \dot{q}_i \dot{q}_j \cos q_i \cos q_j. \quad (11)$$

526 The first candidate input data for the ridge regression were the joint angles and angular velocities (blue  
 527 line in Fig. 4A). The second candidate data were the functions in the forward kinematics of the position  
 528 and velocity of the hip joint (equations (9) and (10), red line in Fig. 4A). The third candidate data were  
 529 the functions that appeared in equation (11) (orange line in Fig. 4A). In GEM (blue crosses in Fig. 4B),  
 530 we calculated the task-relevant and task-irrelevant variabilities based on equation (11).

531 **Relation between ridge regression and principal component analysis** It was possible to  
 532 analytically determine the relation between the ridge regression and principal component analysis (PCA)  
 533 by decomposing  $\mathbf{X}$  using singular value decomposition (SVD),  $\mathbf{X} = \mathbf{U}\mathbf{D}\mathbf{V}^T$ , where  $\mathbf{U} \in \mathbf{R}^{T \times T}$  is an  
 534 orthogonal matrix,  $\mathbf{D} \in \mathbf{R}^{T \times D}$  includes the square root of the  $i$ th eigenvalue of  $\mathbf{X}^T\mathbf{X}$  at  $(i, i)$  element  
 535 and  $D_{i,j} = 0$  when  $i \neq j$ , and  $\mathbf{V} \in \mathbf{R}^{D \times D}$  is an orthogonal matrix. Using the SVD and equation (6), the  
 536 predicted output  $h_t$  can be written as

$$h_t = \mathbf{X}_t \mathbf{w}^* = \mathbf{U}\mathbf{D}(\mathbf{D}^T\mathbf{D} + \lambda\mathbf{I})^{-1}\mathbf{D}^T\mathbf{U}^T\mathbf{y} = \sum_{i=1}^{\min(T,D)} \frac{\lambda_i^2}{\lambda_i^2 + \lambda} \text{Corr}(\mathbf{X}\mathbf{v}_i, \mathbf{y})u_{i,t}, \quad (12)$$

537 where  $\min(T, D)$  determines the rank of  $\mathbf{X}$ ,  $\lambda_i^2$  is an eigenvalue of  $\mathbf{X}^T\mathbf{X}$ ,  $\text{Corr}(\cdot, \cdot)$  indicates the correlation  
 538 between two vectors,  $\mathbf{v}_i$  is the eigenvector of  $\mathbf{X}^T\mathbf{X}$  corresponding to  $\lambda_i^2$ , and  $u_{i,t}$  is the  $(i, t)$  component  
 539 of  $\mathbf{U}$ . On the other hand, PCA enables the decomposition of  $\mathbf{X}_t$  as

$$\mathbf{X}_t = \sum_{i=1}^{\min(T,D)} \lambda_i u_{i,t} \mathbf{v}_i. \quad (13)$$

540 This equation indicates that the motion data can be decomposed into eigenvectors (principal components)  
 541 with weight  $\lambda_i u_{i,t}$ . By comparing equations (12) and (13), the ridge regression enables the prediction  
 542 of output data by weighting based on the  $i$ th eigenvector with weight  $\frac{\lambda_i^2}{\lambda_i^2 + \lambda} u_{i,t}$  (notably,  $\frac{\lambda_i^2}{\lambda_i^2 + \lambda}$  was a  
 543 monotonic function concerning  $\lambda_i$ ). An important difference between PCA and the ridge regression is  
 544 whether the task relevance of the  $i$ th eigenvector,  $\text{Corr}(\mathbf{X}\mathbf{v}_i, \mathbf{y})$ , should be considered. Although PCA  
 545 relies only on the eigenvalue, the ridge regression considers both (nonlinearly transformed) eigenvalue and  
 546 task relevance. The ridge regression could thus be considered an extended version of PCA to determine  
 547 how each principal component is relevant to the task.

548 In PCA, we found the relation between the explained variance and prediction power to be as fol-  
 549 lows: at a  $z\%$  explained variance, we determine the number of principal components based on  $n_z =$   
 550  $\min_n \frac{\sum_{i=1}^n \lambda_i^2}{\sum_{i=1}^{\min(T,D)} \lambda_i^2} > \frac{z}{100}$  (i.e., the minimum number of principal components that exceed  $z\%$  explained  
 551 variance). After determining  $n_z$ , motion data can be reconstructed as  $\tilde{\mathbf{X}}_t = \sum_{i=1}^{n_z} \lambda_i u_{i,t} \mathbf{v}_i$ . We then  
 552 multiply  $\sum_{i=1}^{n_z} \mathbf{v}_i^T$  by the  $\tilde{\mathbf{X}}_t$  from the right-hand side, resulting in  $\tilde{y}_t = \tilde{\mathbf{X}}_t \sum_{i=1}^{n_z} \mathbf{v}_i^T = \sum_{i=1}^{n_z} \lambda_i u_{i,t}$ .  
 553 Finally, we calculate the correlation between observed jumping height  $y_t$  and  $\tilde{y}_t$  in Figs. 4D-4F.

## 554 Acknowledgement

555 This work was supported by a Grant-in-Aid for Young Scientists (18K17894). We thank D. Nozaki and  
 556 S. Hagio for their helpful comments.

## 557 Additional Information

558 Competing interests: The authors declare no competing financial and non-financial interests.

## 559 Data availability

560 All data generated or analyzed during this study are included in this article.

## 561 Author contributions

562 D.F. and K.T. designed and performed the experiments. D.F. and K.T. performed the analyses and  
563 wrote the manuscript.

## 564 References

- 565 1. Bernstein, N. A. The co-ordination and regulation of movements. Pergamon, London (1967).
- 566 2. Faisal, A. A., Selen, L. P. J. & Wolpert, D. M. Noise in the nervous system. *Nat. Rev. Neurosci.* **9**,  
567 292-303 (2008).
- 568 3. Churchland, M. M., Afshar, A. & Shenoy, K. V. A Central Source of Movement Variability. *Neuron*  
569 **52**, 1085-1096 (2006).
- 570 4. Jones, K. E., Hamilton, A. F. & Wolpert, D. M. Sources of signal-dependent noise during isometric  
571 force production. *J. Neurophysiol.* **88**, 1533-1544 (2002).
- 572 5. Dhawale, A. K., Smith, M. A. & Ölveczky, B. P. The Role of Variability in Motor Learning. *Ann.*  
573 *Rev. Neurosci.* **40**, 479-498 (2017).
- 574 6. Bizzi, E., Mussa-Ivaldi, F. A. & Giszter, S. Computations underlying the execution of movement: a  
575 biological perspective. *Science* **253**, 287-291 (1991).
- 576 7. Gribble, P. L., Mullin, L. I., Cothros, N. & Mattar, A. Role of cocontraction in arm movement  
577 accuracy. *J. Neurophysiol.* **89**, 2396-2405 (2003).
- 578 8. Latash, M. L., Scholz, J. P. & Schöner, G. Motor control strategies revealed in the structure of  
579 motor variability. *Exerc. Sport. Sci. Rev.* **30**, 26-31 (2002).
- 580 9. Rokni, U., Richardson, A. G., Bizzi, E. & Seung, H. S. Motor Learning with Unstable Neural Repre-  
581 sentations. *Neuron* **54**, 653-666 (2007).
- 582 10. Takiyama, K. & Okada, M. Maximization of Learning Speed in the Motor Cortex Due to Neuronal  
583 Redundancy. *PLoS Comput. Biol.* **8**, e1002348 (2012).
- 584 11. Scholz, J. P. & Schöner, G. The uncontrolled manifold concept: identifying control variables for a  
585 functional task. *Exp. Brain Res.* **126**, 289-306 (1999).
- 586 12. Todorov, E. & Jordan, M. I. Optimal feedback control as a theory of motor coordination. *Nat.*  
587 *Neurosci.* **5**, 1226-1235 (2002).
- 588 13. Müller, H. & Sternad, D. A randomization method for the calculation of covariation in multiple  
589 nonlinear relations: illustrated with the example of goal-directed movements. *Biol. Cybern.* **89**, 22-33  
590 (2003).
- 591 14. Cusumano, J. P. & Cesari, P. Body-goal variability mapping in an aiming task. *Biol. Cybern.* **94**,  
592 367-379 (2006).
- 593 15. Kaufman, M. T., Churchland, M. M., Ryu, S. I. & Shenoy, K. V. Cortical activity in the null space:  
594 permitting preparation without movement. *Nat. Neurosci.* **17**, 440-448 (2014).
- 595 16. Krishnamoorthy, V., Latash, M. L., Scholz, J. P. & Zatsiorsky, V. M. Muscle synergies during shifts  
596 of the center of pressure by standing persons. *Exp. Brain Res.* **152**, 281-292 (2003).
- 597 17. Valero-Cuevas, F. J., Venkadesan, M. & Todorov, E. Structured Variability of Muscle Activations  
598 Supports the Minimal Intervention Principle of Motor Control. *J. Neurophysiol.* **102**, 59-68 (2009).
- 599 18. Yang, J.-F., Scholz, J. P. & Latash, M. L. The role of kinematic redundancy in adaptation of reaching.  
600 *Exp. Brain Res.* **176**, 54-69 (2006).
- 601 19. d'Avella, A., Saltiel, P. & Bizzi, E. Combinations of muscle synergies in the construction of a natural  
602 motor behavior. *Nat. Neurosci.* **6**, 300-308 (2003).

- 603 20. Ivanenko, Y. P., Cappellini, G., Dominici, N., Poppele, R. E. & Lacquaniti, F. Modular control of  
604 limb movements during human locomotion. *J. Neurosci.* **27**, 11149-11161 (2007).
- 605 21. Hagio, S. & Kouzaki, M. The flexible recruitment of muscle synergies depends on the required  
606 force-generating capability. *J. Neurophysiol.* **112**, 316-327 (2014).
- 607 22. Furuya, S., Tominaga, K., Miyazaki, F. & Altenmüller, E. Losing dexterity: patterns of impaired  
608 coordination of finger movements in musician's dystonia. *Sci. Rep.* **5**, 13360 (2015).
- 609 23. Lacquaniti, F. & Maioli, C. Independent control of limb position and contact forces in cat posture.  
610 *J. Neurophysiol.* **72**, 1476-1495 (1994).
- 611 24. Dominici, N. et al. Locomotor Primitives in Newborn Babies and Their Development. *Science* **334**,  
612 997-999 (2011).
- 613 25. Lee, D. D. & Seung, H. S. Learning the parts of objects by non-negative matrix factorization. *Nature*  
614 **401**, 788-791 (1999).
- 615 26. Santello, M. & Soechting, J. F. Gradual molding of the hand to object contours. *J. Neurophysiol.*  
616 **79**, 1307-1320 (1998).
- 617 27. Delis, I., Berret, B., Pozzo, T. & Panzeri, S. Quantitative evaluation of muscle synergy models: a  
618 single-trial task decoding approach. *Front. Comput. Neurosci.* **7**(8), (2013).
- 619 28. Bishop, C. M. Pattern Recognition and Machine Learning (Springer Verlag, 2006).
- 620 29. Hoerl, A. E. & Kennard, R. W. Ridge regression: Biased estimation for nonorthogonal problems.  
621 *Technometrics* **12**, 55-67 (1970).
- 622 30. Furuki, D. & Takiyama, K. Detecting the relevance to performance of whole-body movements. *Sci.*  
623 *Rep.* **7**, 15659 (2017).
- 624 31. Krakauer, J. W., Pine, Z. M., Ghilardi, M. F. & Ghez, C. Learning of visuomotor transformations  
625 for vectorial planning of reaching trajectories. *J. Neurosci.* **20**, 8916-8924 (2000).
- 626 32. Cotti, J. et al. Adaptation of reactive and voluntary saccades: different patterns of adaptation  
627 revealed in the antisaccade task. *J. Physiol.* **587**, 127-138 (2009).
- 628 33. Wu, H. G., Miyamoto, Y. R., Castro, L. N. G., Ivezky, B. P. O. & Smith, M. A. Temporal structure  
629 of motor variability is dynamically regulated and predicts motor learning ability. *Nat. Neurosci.* **17** 1-13  
630 (2014).
- 631 34. Kagerer, F. A., Contreras-Vidal, J. L. & Stelmach, G. E. Adaptation to gradual as compared with  
632 sudden visuo-motor distortions. *Exp. Brain Res.* **115**, 557-561 (1997).
- 633 35. Sternad, D., Park, S.-W., Mueller, H. & Hogan, N. Coordinate Dependence of Variability Analysis.  
634 *PLoS Comput. Biol.* **6**(4):e1000751 (2010).
- 635 36. Shinya, M., Tsuchiya, S., Yamada, Y., Nakazawa, K., Kudo, K. & Oda, S. Pitching form determines  
636 probabilistic structure of errors in pitch location. *J. Sports Sci.* **35**, 2142-2147 (2017).
- 637 37. Cohen, R. G. & Sternad, D. Variability in motor learning: relocating, channeling and reducing noise.  
638 *Exp. Brain Res.* **193**, 69-83 (2009).
- 639 38. Thoroughman, K. A. & Shadmehr, R. Learning of action through adaptive combination of motor  
640 primitives. *Nature* **407**, 742-747 (2000).
- 641 39. Scheidt, R. A., Dingwell, J. B. & Mussa-Ivaldi, F. A. Learning to move amid uncertainty. *J.*  
642 *Neurophysiol.* **86**, 971-985 (2001).
- 643 40. Donchin, O., Francis, J. T. & Shadmehr, R. Quantifying generalization from trial-by-trial behavior  
644 of adaptive systems that learn with basis functions: theory and experiments in human motor control. *J.*  
645 *Neurosci.* **23**, 9032-9045 (2003).
- 646 41. Smith, M. A., Ghazizadeh, A. & Shadmehr, R. Interacting adaptive processes with different timescales  
647 underlie short-term motor learning. *PLoS Biol.* **4**, e179 (2006).
- 648 42. Takiyama, K., Hirashima, M. & Nozaki, D. Prospective errors determine motor learning. *Nat.*  
649 *Comm.* **6**, 5925 (2015).
- 650 43. Takiyama, K. Context-dependent memory decay is evidence of effort minimization in motor learning:  
651 a computational study. *Front. Comput. Neurosci.* **9**, 1-10 (2015).

- 652 44. Takiyama, K. & Sakai, Y. Balanced motor primitive can explain generalization of motor learning  
653 effects between unimanual and bimanual movements. *Sci. Rep.* **6**, 23331, (2016).
- 654 45. Takiyama, K. & Sakai, Y. A balanced motor primitive framework can simultaneously explain motor  
655 learning in unimanual and bimanual movements. *Neural Netw.* **86**, 80-89 (2017).
- 656 46. Ishii, K., Hayashi, T. & Takiyama, K. Influence of switching rule on motor learning. *Sci. Rep.* **8**,  
657 13559 (2018).
- 658 47. Pouget, A., & Sejnowski, T. J. Spatial transformations in the parietal cortex using basis functions.  
659 *J. Cogn. Neurosci.* **9**, 222-237 (1997).
- 660 48. Takiyama, K., Katahira, K. & Okada, M. Exact inference in discontinuous firing rate estimation  
661 using belief propagation. *J. Phys. Soc. Jpn.* **78**, 4003 (2009).
- 662 49. Takiyama, K. & Okada, M. Detection of hidden structures in nonstationary spike trains. *Neural*  
663 *Comput.* **23**, 1205-1233 (2011).
- 664 50. Naruse, Y., Takiyama, K., Okada, M. & Umehara, H. Statistical method for detecting phase shifts  
665 in alpha rhythm from human electroencephalogram data. *Phys. Rev. E* **87**, 042708 (2013).
- 666 51. Tibshirani, R. Regression shrinkage and selection via the lasso. *J. R. Stat. Soc. Series B.*, 267-288  
667 (1996).
- 668 52. Rasmussen, C. E. & Williams, C. K. I. Gaussian Processes for Machine Learning (MIT Press, 2006).
- 669 53. Pacheco, M. M. & Newell, K. M. Learning a specific, individual and generalizable coordination  
670 function: evaluating the variability of practice hypothesis in motor learning. *Exp. Brain Res.* 1-12  
671 (2018).
- 672 54. Pacheco, M. M. & Newell, K. M. Transfer of a learned coordination function: Specific, individual  
673 and generalizable. *Hum. Mov. Sci.* **59**, 66-80 (2018).
- 674 55. Bartlett, R., Wheat, J. & Robins, M. Is movement variability important for sports biomechanists?  
675 *Sports Biomech.* **6**, 224-243 (2007).
- 676 56. Srinivasan, D. & Mathiassen, S. E. Motor variability in occupational health and performance. *Clin.*  
677 *Biomech.* **27**, 979-993 (2012).
- 678 57. Golenia, L., Bongers, R. M., van Hoorn, J. F., Otten, E., Mouton, L. J. & Schoemaker, M. M.,  
679 Variability in coordination patterns in children with developmental coordination disorder (DCD). *Hum.*  
680 *Mov. Sci.* **60**, 202-213 (2018).



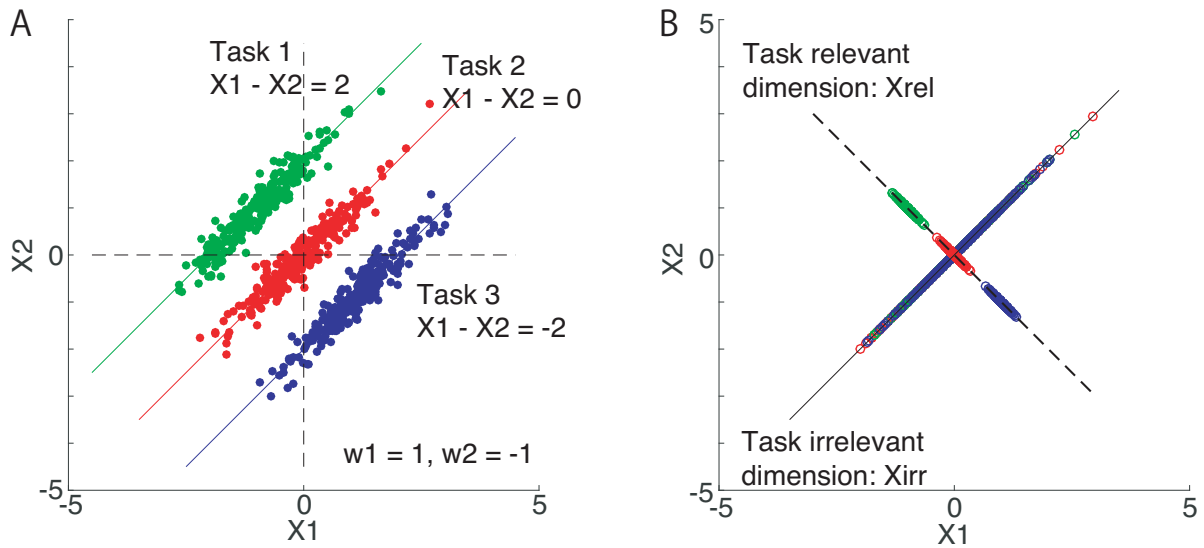

Figure 1

## Figure legends

681

682 **Figure 1.** The concept of our method. **A:** An example of decomposing input data  $\mathbf{X}$  into task-relevant  
 683  $\mathbf{X}_{\text{rel}}$  and task-irrelevant components  $\mathbf{X}_{\text{irr}}$ . In this case, we assumed that the task 1 required  $X_1 - X_2$  to  
 684 be 2 (green line), task 2 required  $X_1 - X_2$  to be 0 (red line), and task 3 required  $X_1 - X_2$  to be -2 (blue  
 685 line). Green, red, and blue dots indicate the typical input data for tasks 1, 2, and 3, respectively. In the  
 686 ridge regression, these tasks can be achieved with  $w_1 = 1$  and  $w_2 = -1$ , i.e.,  $h = w_1 X_1 + w_2 X_2 = X_1 - X_2$   
 687 should be determined differently in each task. **B:** The input data were decomposed into a task-relevant  
 688 (black dotted line) component  $\mathbf{X}_{\text{rel}} = \mathbf{X} \mathbf{w} \mathbf{w}^T / \|\mathbf{w}\|^2$  and a task-irrelevant component  $\mathbf{X}_{\text{irr}} = \mathbf{X} - \mathbf{X}_{\text{rel}}$   
 689 (solid black line).  $\mathbf{X}_{\text{rel}}$  was separated depending on the task, and  $\mathbf{X}_{\text{irr}}$  was not separated, which indicates  
 690 that the decomposition enables the discussion of the task-relevant and task-irrelevant components.

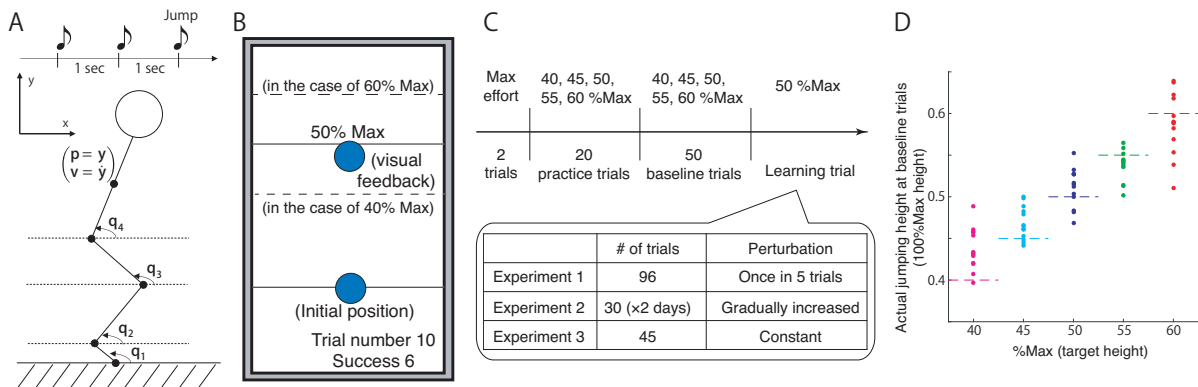

Figure 2

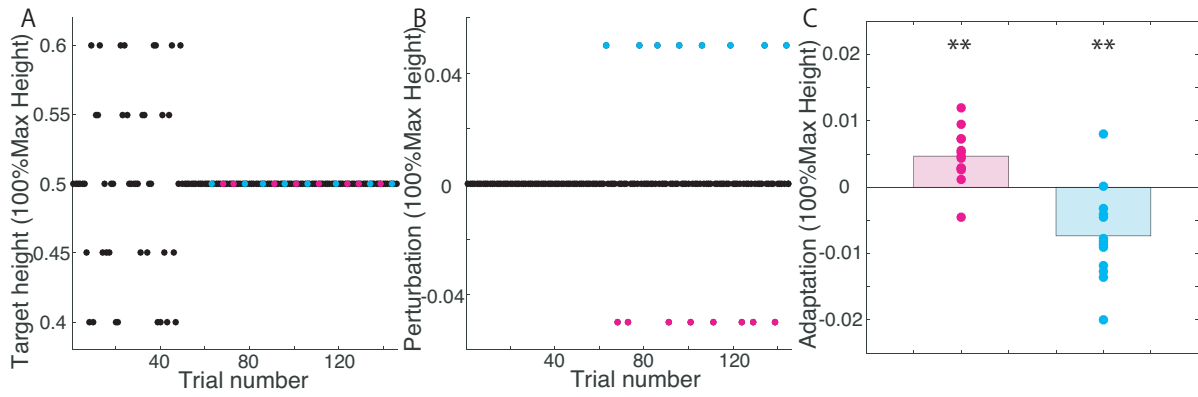

Figure 3

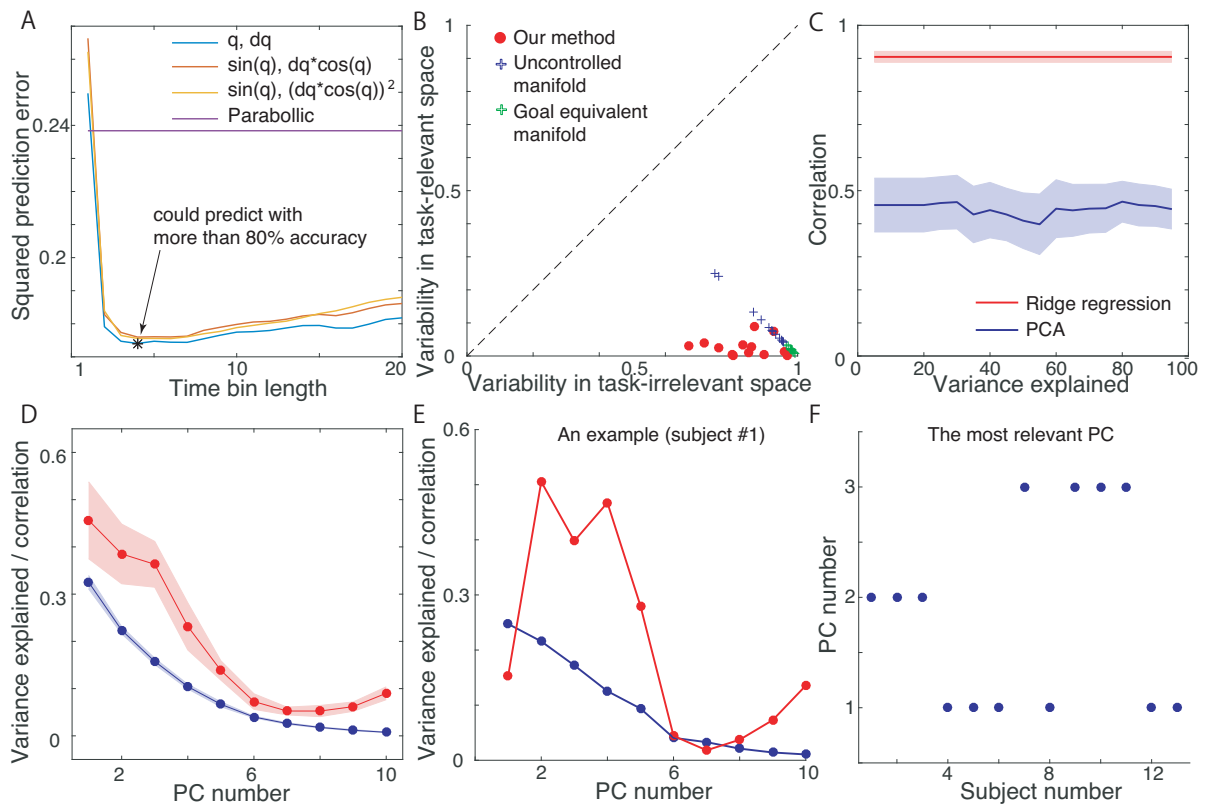

Figure 4

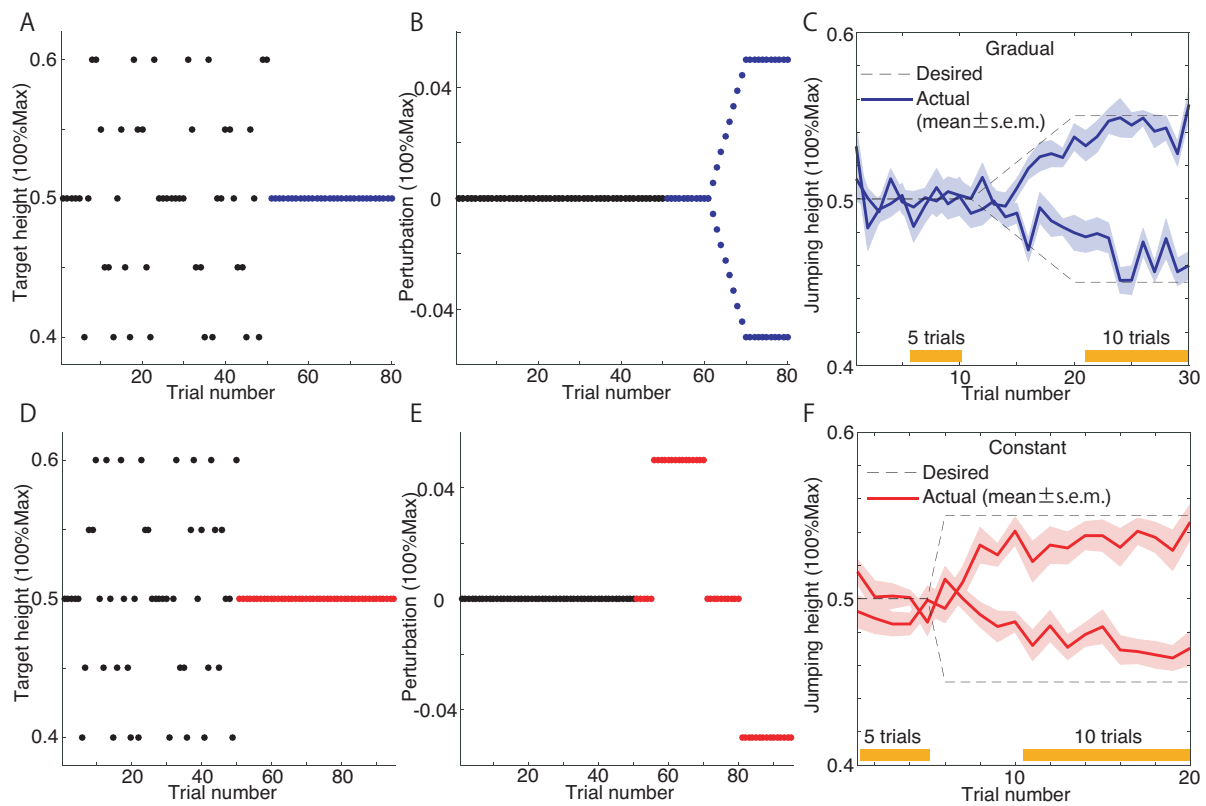

Figure 5

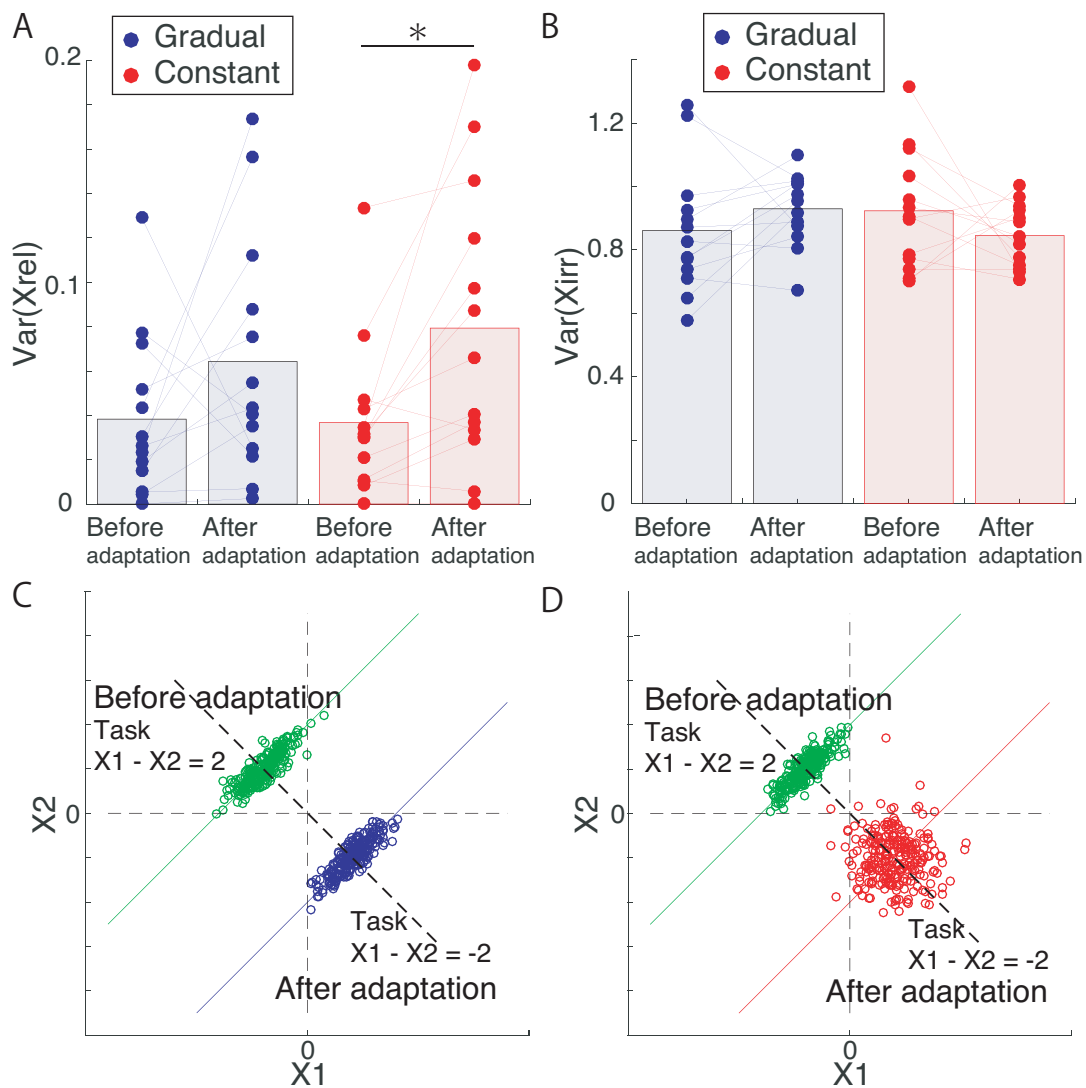

Figure 6

691 **Figure 2.** Summary of our experimental settings. **A:** Participants were instructed to perform a  
692 vertical jump at the timing of the third beep. Three beeps sounded at one-second intervals. We measured  
693 and analyzed joint angles at toe, ankle, knee, and hip in the sagittal plane. The jumping height was  
694 measured based on the position of the marker attached to the back in the y-axis. **B:** Task instruction  
695 and feedback information in each trial. A computer monitor was located in front of the participants (1.5  
696 meters ahead, 1.7 meters above the floor). One second before the first beep, target height (indicated by  
697 black bar and texts [e.g., 50% max]), baseline height (indicated by black bar), and initial position (shown  
698 by blue cursor located on the baseline height) were displayed. When the target height was 60%, the black  
699 bar and text were presented at the position of the higher black dotted bar. When the target height was  
700 40%, the black bar and text were displayed at the location of the lower black dotted bar. These black  
701 dotted bars were used only for the explanation and were not visible throughout the experiments. In the  
702 practice trials, the blue cursor was displayed during trials to continuously indicate the position of the  
703 marker attached to the back in the y-axis. These trials enabled the participants to become accustomed to  
704 the experimental setting. In baseline and learning trials, the blue cursor was displayed at the beginning  
705 and end of each trial. At the beginning of each trial, the blue cursor was presented at the baseline height.  
706 At the end of each trial, the cursor was displayed depending on the actual jumping height. When the  
707 jumping height was close to the target height, the participants heard a coin-getting sound. During the  
708 experiments, the subjects were provided with the current trial number and the number of successful trials.  
709 **C:** The sequence of the experiments. Participants performed a vertical jump with maximum effort for  
710 two trials. These jumping heights were used to determine the target height. Participants experienced  
711 20 practice trials, 50 baseline trials, and a number of learning trials specific to each experiment. **D:**  
712 Averaged jumping height of each participant in the baseline trials in experiment 1. The jumping height  
713 depended on the target height (one-way repeated measure ANOVA,  $p = 6.114 \times 10^{-24}$ ), indicating that  
714 the participants could perform the goal-directed movement.

715 **Figure 3.** Diagram and results of experiment 1. **A:** Target height in baseline and learning trials.  
716 Cyan and magenta circles indicated the trials with perturbations. **B:** Perturbation sequence. The cyan  
717 circle indicates the trials with  $p=0.05$ , and the magenta circle indicates those with  $p = -0.05$ . The  
718 perturbations were pseudorandomly imposed once in five trials. **C:** Adaptation effect. The vertical line  
719 indicates the modification of the jumping height after the perturbation was imposed. Magenta dots  
720 indicate the averaged difference in each subject corresponding to the perturbation  $p = -0.05$ , and cyan  
721 dots indicate the averaged difference in each subject corresponding to the perturbation  $p = 0.05$ .

722 **Figure 4.** Validation of our method and comparison to previous methods. **A:** Predictive power of the  
723 ridge regression using three kinds of input data. Horizontal and vertical axes indicate the time bin length  
724 used for the ridge regression and squared prediction error, respectively. If the ridge regression could not  
725 make a prediction, the prediction error equaled 1. If the ridge regression could predict the output data  
726 perfectly, the prediction error equaled 0. These results indicate that ridge regression enables the prediction  
727 of output data with an  $82.6 \pm 2.28\%$  (mean  $\pm$  s.e.m.,  $N=13$ ) accuracy. **B:** Evaluation of task-relevant and  
728 task-irrelevant variabilities. Red dots indicate those variabilities evaluated by our method in each subject  
729 ( $N = 13$ ). Blue and green crosses indicate the variabilities evaluated by the UCM and GEM, respectively.  
730 Our method uses a different normalization method from those of the UCM and GEM. **C:** Correlation  
731 between predicted and actual jumping height. The red line and the shaded area indicate the mean and  
732 standard error of the mean (s.e.m.) of the correlation in ridge regression ( $N = 13$ ), respectively. The  
733 blue line and shaded area indicate the mean and s.e.m. of the correlation in PCA ( $N = 13$ ), respectively.  
734 Horizontal and vertical axes indicate the explained variance or the corresponding number of principal  
735 components and the correlation, respectively. **D:** Explained variance and the correlation between the  
736 predicted and actual jumping height of each principal component. The red line and the shaded area  
737 indicate the mean and s.e.m. of the correlation ( $N = 13$ ), respectively. The blue line and the shaded area  
738 indicate mean and s.e.m. of the variance explained ( $N = 13$ ), respectively. **E:** Variance explained and  
739 the correlation between the predicted and actual jumping height of each principal component in a typical

740 subject. The red and blue lines indicate the correlation and the variance explained, respectively. **F**: The  
741 PC number that is most relevant to predicting jumping height. Horizontal and vertical axes indicate the  
742 subject number and the most relevant PC number, respectively.

743 **Figure 5.** Diagram and results of experiments 2 and 3. **A,D**: Target height in baseline and learning  
744 trials. Blue and red circles indicate the trials with perturbations. **B,E**: Perturbation sequence. Subjects  
745 joined experiment 2 for two days and experienced two different perturbations (either  $p > 0$  or  $p < 0$ ). The  
746 order of perturbation was counterbalanced across subjects. In experiment 3, subjects experienced both  
747 positive and negative perturbations within one day. Although panel E showed the case when a negative  
748 perturbation followed a positive one, the order of the perturbation was counterbalanced across subjects.  
749 **C,F**: Learning curves. The thin solid lines indicate the learning curves of each subject. The bold solid  
750 line indicates the learning curve averaged across all subjects.

751 **Figure 6.** Application of our method to the results of experiments 2 and 3. **A**: Task-relevant  
752 variabilities of each subject ( $N = 13$ ) before and after adaptation to perturbation in experiments 2 and  
753 3. The blue and red dots indicate the variability of each subject in experiments 2 and 3, respectively.  
754 The blue and red lines show the modulation of the variability due to adaptation. The blue and red  
755 bars indicate the averaged variability across all subjects. There was a significant difference between the  
756 variabilities before the adaptation and those after the adaptation in experiment 3 (Wilcoxon signed rank  
757 test,  $p = 0.0034$ ). **B**: Task-irrelevant variabilities of each subject ( $N = 13$ ) before and after adaptation  
758 to perturbation in experiments 2 and 3. **C,D**: Interpretation of our results based on a simple example.  
759 We assume that the task before adaptation required  $X_1 - X_2$  to be 2 and that the task after adaptation  
760 required  $X_1 - X_2$  to be -2. Panel C indicates an interpretation of our results in experiment 2. In  
761 experiment 2, there was no modulation in both task-relevant and task-irrelevant variabilities. Panel D  
762 suggests an explanation of our findings from experiment 3. In the experiment, task-relevant variabilities  
763 increased after adaptation, and task-irrelevant variabilities remained unchanged.
